# Supplementary material for: Acidity-responsive polyphenol-coordinated nanovaccines for improving tumor immunotherapy via bidirectional reshaping of the immunosuppressive microenvironment and controllable release of antigens
Source: Royal Society of Chemistry journal article supplement (doi:10.1039/d4bm00490f), 2024-01-01
Supplement: d4bm00490f1.pdf [file d4bm00490f1.pdf]

## Supplementary Information

**Acidity-responsive polyphenol-coordinated nanovaccine for improving tumor immunotherapy via bidirectional reshape of immunosuppressive microenvironment and controllable release of antigen**

*Huimin Qiu,<sup>#</sup> Shuman Wang,<sup>#</sup> Rimei Huang,<sup>#</sup> Xingyu Liu, Liquan Li, Zheng Liu, Aihui Wang, Shichen Ji, Hong Liang, Bang-Ping Jiang\* and Xing-Can Shen\**

*State Key Laboratory for Chemistry and Molecular Engineering of Medicinal Resources, School of Chemistry and Pharmaceutical Sciences, Guangxi Normal University, Guilin, 541004, P. R. China.*

*<sup>#</sup>The authors contributed equally to this work.*

*E-mail: xcshen@mailbox.gxnu.edu.cn;jiangbangping@mailbox.gxnu.edu.cn*

## **Experimental Section**

### *Characterization*

The morphology of the samples were characterized by transmission electron microscopy (TEM) (JEM-2100F, JEOL Ltd, Tokyo, Japan). Dynamic light scattering (DLS) measurements were recorded using Malvern Zetasizer Nano ZS-90 (Nano ZS-90, Malvern Instruments, Malvern, UK). Fourier transform infrared (FT-IR) spectra of the samples were characterized using FT-IR spectrometer (Spectrum Two, PerkinElmer, Waltham, MA, USA). Raman spectroscopy was carried out on confocal Raman microscope (in Via Quotation, Renishaw, UK) with 785-nm near-infrared laser excitation. The circular dichroism (CD) spectra using spectropolarimeter system (JASCO, J-810). A confocal laser scanning microscope (CLSM) (Leica TCS SP8 DIVE, Wetzlar, Germany) was used to obtain fluorescence images of the cells. UV-Vis-NIR absorption spectra were recorded with a spectrometer (UV-2600, Shimadzu). Try and Kyn content were acquired on time-of-flight liquid chromatography/mass spectrometry (Q-TOF HPLC-MS, Agilent Technologies, Santa Clara, CA, USA). Binding energy values were collected by X-ray photoelectron spectroscopy using monochromated Al K $\alpha$  radiation (Nexsa, Thermo Fisher Scientific, Waltham, MA, USA). Temperature and images of the samples were recorded with a MAG 30 Infrared camera (Magnity Electronics, Shanghai, China).

### *In vivo Immunoassay*

For macrophage polarization analysis, the tumors of mice were collected, homogenized in PBS, and filtered to gain singlecell suspension. Then, the cell

suspension of tumors was stained with anti-CD206-FITC, anti-F4/80-APC antibodies for macrophage phenotype analysis by flow cytometry. The content of cytokines (IL-12 and IL-10) in serum was measured using ELISA kits.

To analyze Tregs, the tumors of mice were collected, homogenized in PBS to obtain single-cell suspension, the suspension was stained by anti-CD4-FITC, anti-CD3-APC and anti-FOXP3-PE, analyzed by flow cytometry.

For DCs maturation analysis, the distant tumors of mice were collected, homogenized in PBS, and filtered to gain single-cell suspension. Afterwards, the cell suspension of distant tumors was stained with anti-CD86-PE and anti-CD80-FITC antibodies for DCs maturation analysis by flow cytometry. The content of cytokines (IL-6, IFN- $\gamma$  and TNF- $\alpha$ ) in serum was measured using ELISA kits.

For T cells activation analysis, the distant tumors of mice were collected, homogenized in PBS, and filtered to gain single-cell suspension. Afterwards, the cell suspension of distant tumors was stained with anti-CD8-PE, anti-CD4-FITC and anti-CD3-APC, analyzed by flow cytometry.

To analyze memory T cells, the single cell suspensions harvested from spleen of mice were respectively stained with anti-CD8-PE, anti-CD62-APC and anti-CD44-Brilliant Violet 421 antibodies to differentiate central memory T cells ( $T_{CM}$ ,  $CD8^+CD44^+CD62L^+$ ) and effector memory T cells ( $T_{EM}$ ,  $CD8^+CD44^+CD62L^-$ ) by flow cytometry.

*In vivo histological examinations and biosafety assessments*

For histological analysis, the tumor-bearing mice in different treatment groups were sacrificed at 14 days post-injection, and the vital organs (heart, liver, spleen, lung, and kidney) and tumor tissues were excised, fixed in 4% paraformaldehyde overnight, and embedded in paraffin for H&E staining to observe the histological changes. The tumors were sectioned into slices for terminal deoxynucleotidyl transferase-mediated dUTP-biotin nick end labeling (TUNEL), Ki-67 and H&E staining for histological analysis according to standard protocols.

#### *In vivo immunofluorescence staining*

The tumor tissues were also sectioned for CD206, CD4 and CD8 immunofluorescence staining to determine the expression of CD206, CD4 and CD8 in tumor sections.

#### *Anti-metastasis effect of combination therapy*

Melanoma C57BL/6 mouse were treated with a unilateral tumor regimen. The tumor on each mouse was removed by surgery at 14 days post treatment. Immunomemory analysis was performed on day 30, and  $1 \times 10^6$  B16-OVA cells were administered intravenously via tail vein into each C57BL/6 mouse. After 20 days, the mice were sacrificed, the lungs were extracted and photographed, and the pulmonary metastatic nodules were counted. The lung tissues were also fixed in 4% formaldehyde, embedded in paraffin, sectioned, and stained with hematoxylin-eosin (H&E) for immunohistochemical analysis according to standard protocols.

## Supplementary Figures

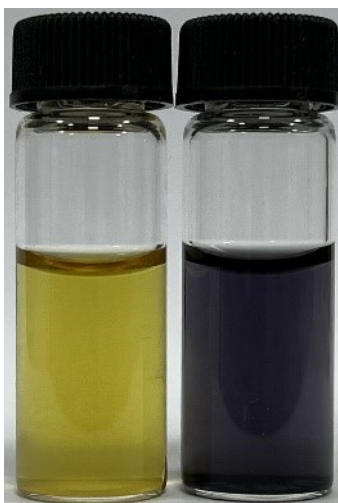

**Fig. S1.** The Photos of TA-OVA and Fe<sup>III</sup>-TA-OVA.

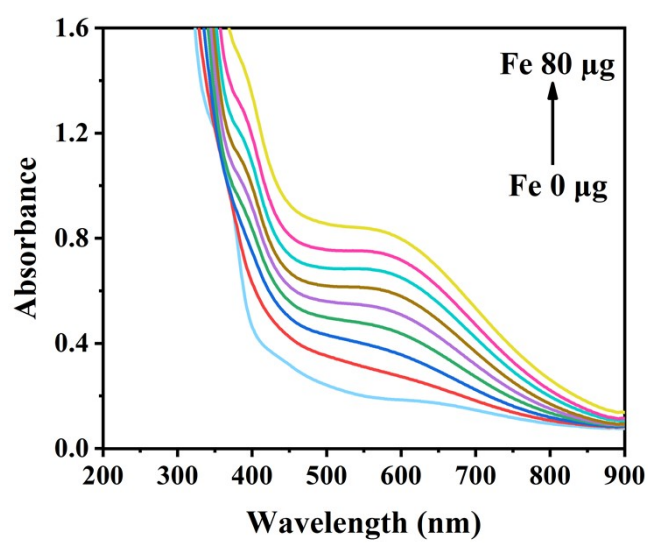

**Fig. S2.** UV-Vis-NIR absorption spectra of TA-OVA with increasing Fe<sup>III</sup> content.

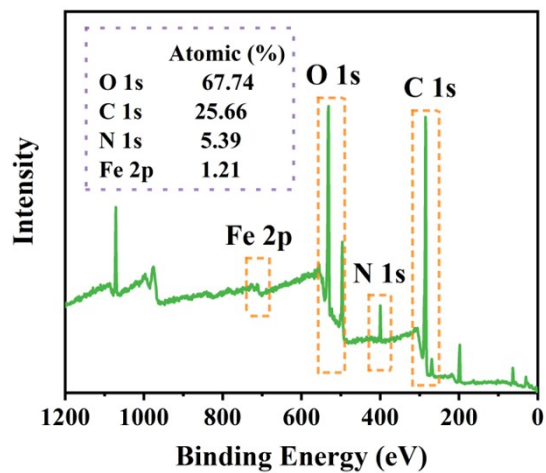

**Fig. S3.** XPS survey spectrum of Fe<sup>III</sup>-TA-OVA: survey.

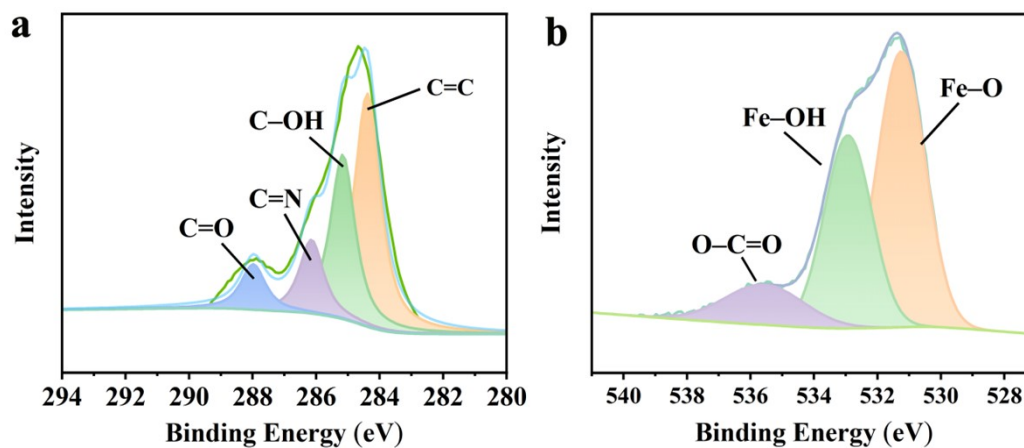

**Fig. S4.** XPS survey spectrum of Fe<sup>III</sup>-TA-OVA : (a) C 1s spectra. (b) O 1s spectra.

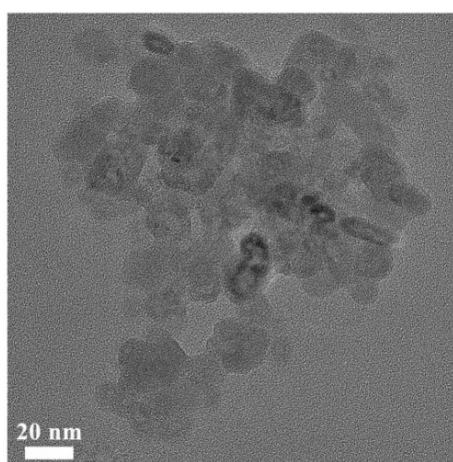

**Fig. S5.** TEM image of TA-OVA.

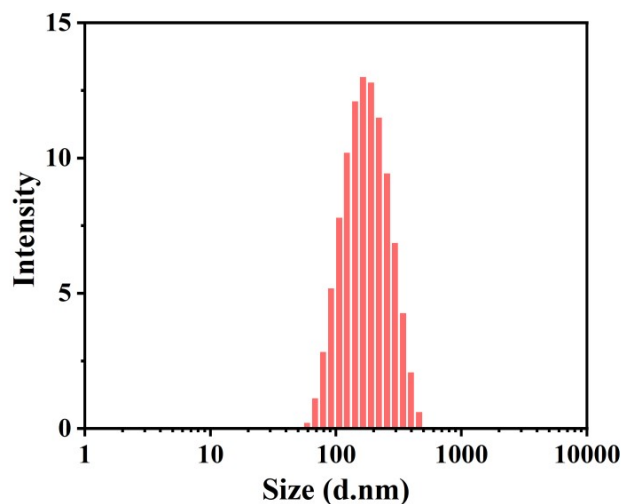

Fig. S6. The hydrodynamic size of Fe<sup>III</sup>-TA-OVA.

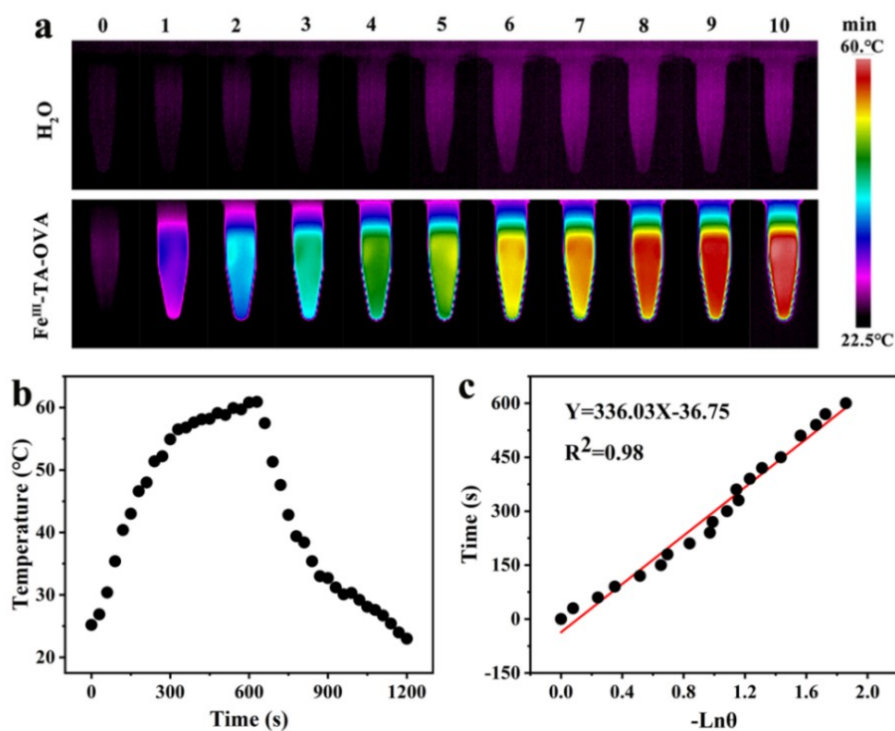

Fig. S7. (a) Photothermal images of Fe<sup>III</sup>-TA-OVA ( $500 \mu\text{g mL}^{-1}$ ) and water upon exposure to 808-nm laser ( $1 \text{ W cm}^{-2}$ ) for various time periods. (b) The temperature curve of Fe<sup>III</sup>-TA-OVA ( $500 \mu\text{g mL}^{-1}$ ) under irradiation (808-nm,  $1 \text{ W cm}^{-2}$ ), and then the laser was removed. (c) Linear time data versus  $-\text{Ln}\theta$  obtained from the cooling period of (b).

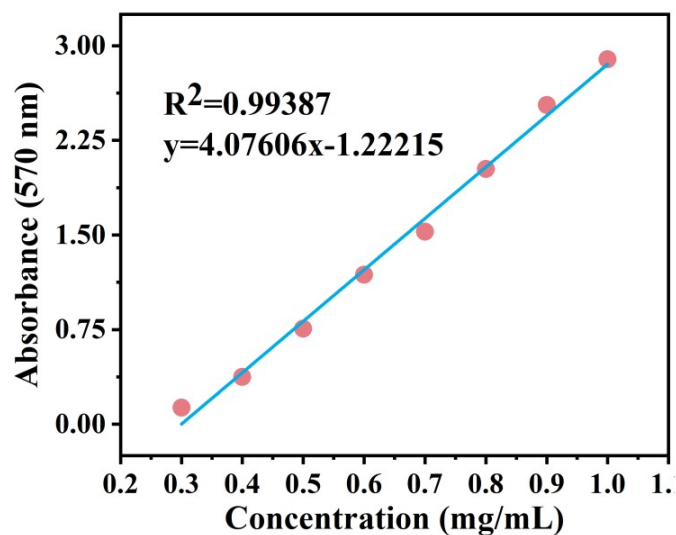

Fig. S8. Standard curve of 1-MT concentration.

Table S1 The content of 1-MT in Fe<sup>III</sup>-TA-OVA@1-MT, determined using Ninhydrin colorimetry.

| NO.     | 1-MT of Fe <sup>III</sup> -TA-OVA@1-MT (mg) | Input 1-MT (mg) | Fe <sup>III</sup> -TA-OVA@1-MT (mg) | Encapsulation Rate (%) | Loading Rate (%) |
|---------|---------------------------------------------|-----------------|-------------------------------------|------------------------|------------------|
| 1       | 17.7                                        | 30              | 100                                 | 59.0                   | 17.7             |
| 2       | 15.5                                        | 30              | 100                                 | 51.7                   | 15.5             |
| 3       | 17.0                                        | 30              | 100                                 | 56.7                   | 17.0             |
| Average | 16.7                                        | 30              | 100                                 | 55.8                   | 16.7             |



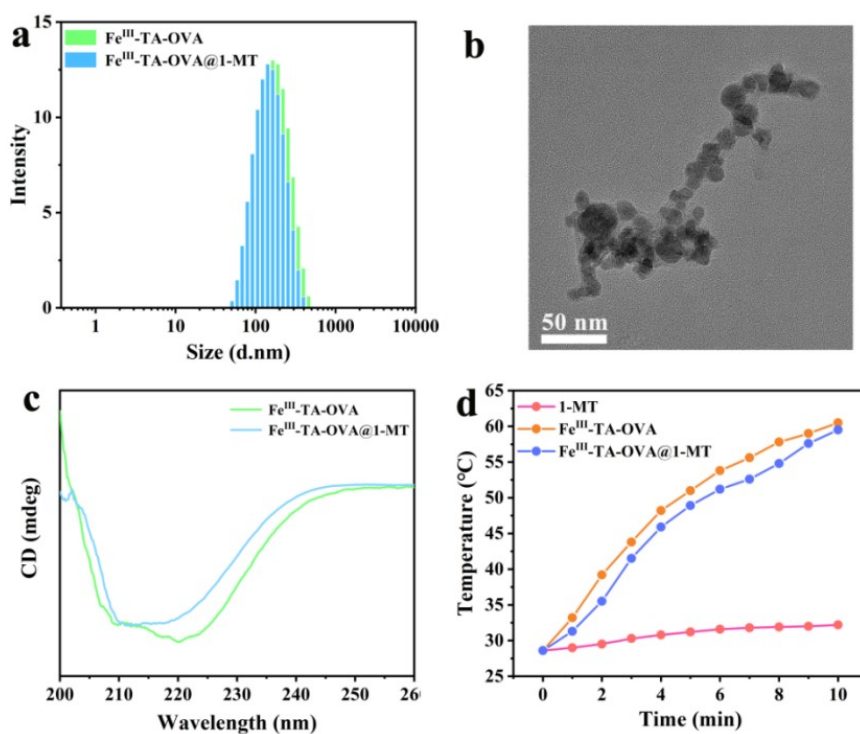

**Fig. S9.** (a) The hydrodynamic size of Fe<sup>III</sup>-TA-OVA and Fe<sup>III</sup>-TA-OVA@1-MT. (b) TEM imaging of Fe<sup>III</sup>-TA-OVA@1-MT. (c) CD spectrum of Fe<sup>III</sup>-TA-OVA and Fe<sup>III</sup>-TA-OVA@1-MT. (d) Photothermal heating curves of different aqueous suspensions of 1-MT, Fe<sup>III</sup>-TA-OVA and Fe<sup>III</sup>-TA-OVA@1-MT (500  $\mu\text{g mL}^{-1}$ ) under irradiation of 808-nm laser (1 W  $\text{cm}^{-2}$ ).

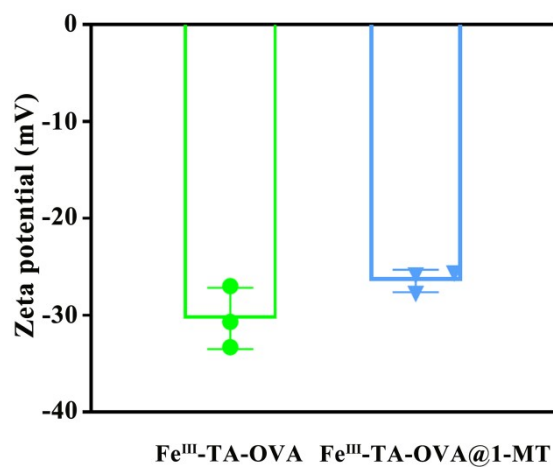

**Fig. S10.** Zeta potential of Fe<sup>III</sup>-TA-OVA and Fe<sup>III</sup>-TA-OVA@1-MT.

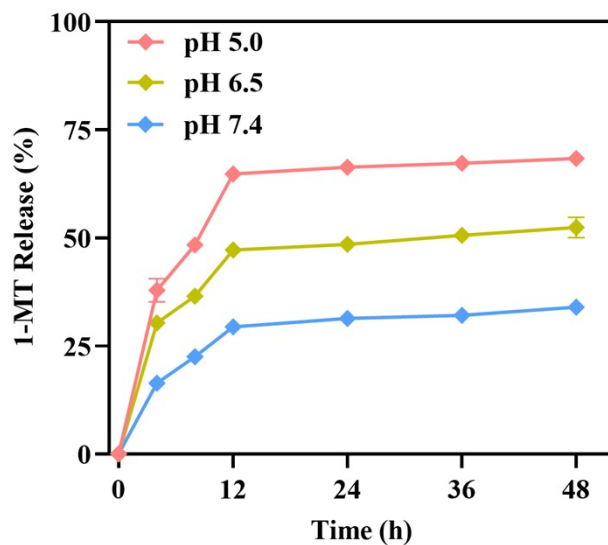

**Fig. S11.** Release curves of 1-MT from Fe<sup>III</sup>-TA-OVA@1-MT in PBS with different pH values.

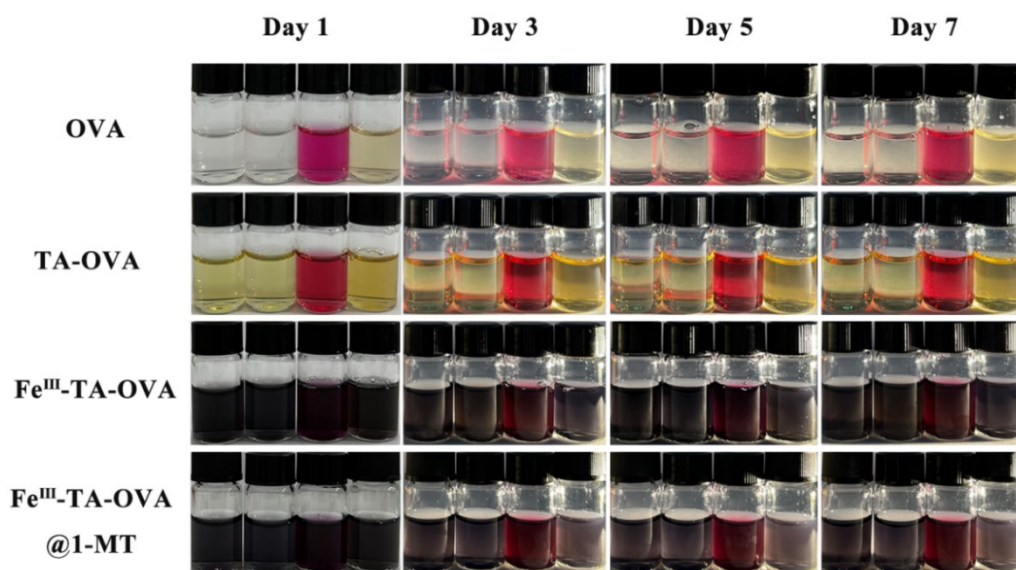

**Fig. S12.** Pictures of free OVA, TA-OVA, Fe<sup>III</sup>-TA-OVA and Fe<sup>III</sup>-TA-OVA@1-MT dispersed in PBS, Saline, DMEM + 10% FBS and FBS solutions for 1, 3, 5 and 7 days.

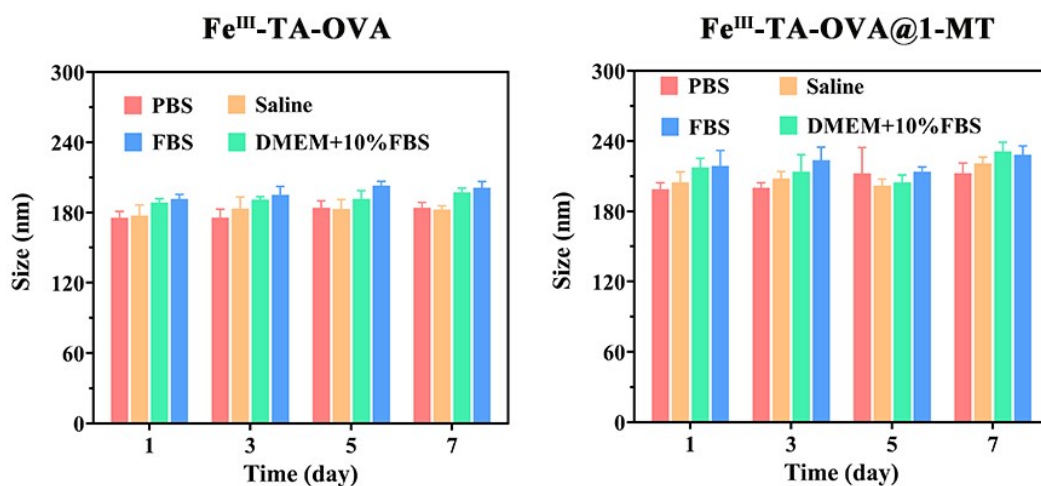

**Fig. S13.** Time-dependent size of Fe<sup>III</sup>-TA-OVA and Fe<sup>III</sup>-TA-OVA@1-MT in PBS, saline, DMEM + 10% FBS and FBS.

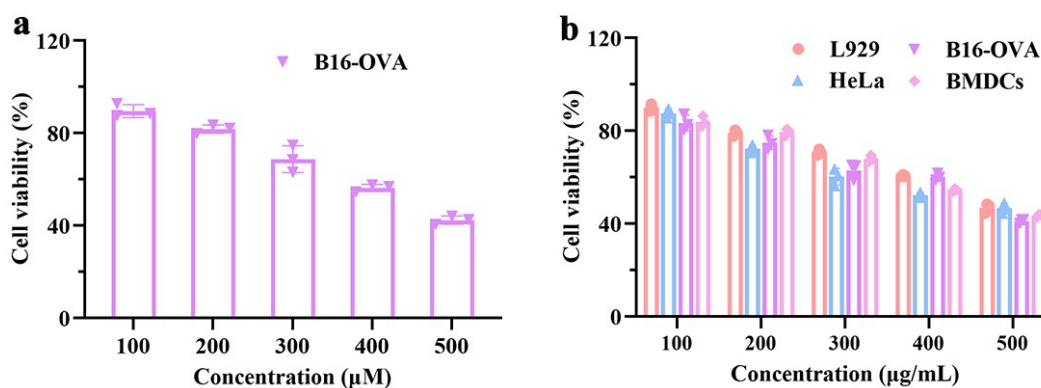

**Fig. S14.** (a) Relative cell viability of B16-OVA after incubation with Fe<sup>III</sup>-TA-OVA@1-MT(500 μg mL<sup>-1</sup>) and pretreatment by different concentrations of H<sub>2</sub>O<sub>2</sub>. (b) Relative cell viability of L929, HeLa, B16-OVA and BMDCs cells after incubation with different concentrations of Fe<sup>III</sup>-TA-OVA@1-MT and pretreatment by 500 μM H<sub>2</sub>O<sub>2</sub>.

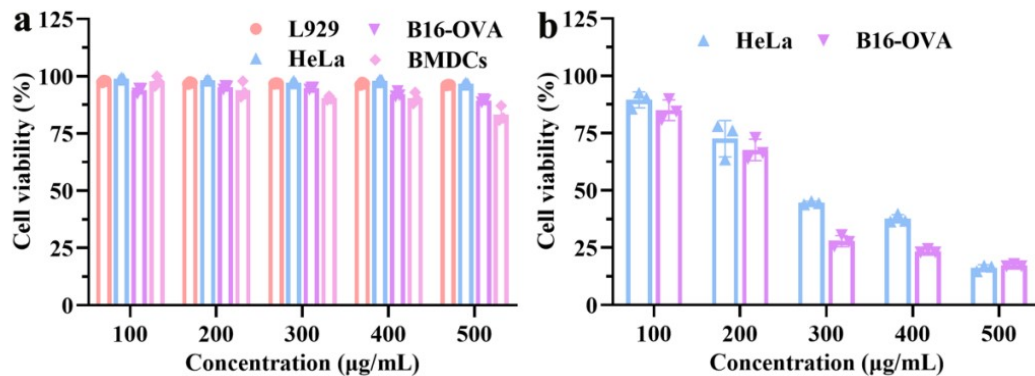

**Fig. S15.** (a) Relative cell viability of L929, HeLa, B16-OVA and BMDCs cells after incubation with different concentrations of Fe<sup>III</sup>-TA-OVA. (b) Relative cell viability of HeLa and B16-OVA cells after incubated with different concentrations of Fe<sup>III</sup>-TA-OVA by laser irradiation. The laser irradiation was performed using 808-nm laser for 5 min (1 W cm<sup>-2</sup>).

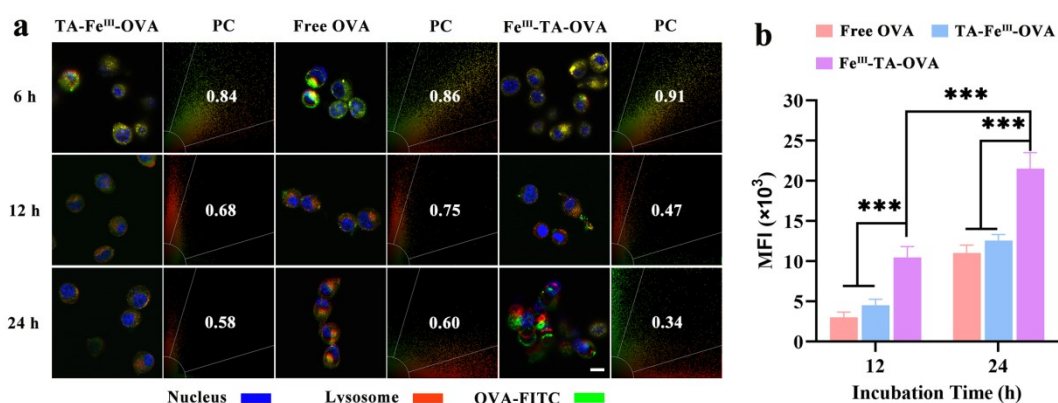

**Fig. S16.** (a) CLSM images of a LysoTracker colocalization assay performed in B16-OVA cells after incubation for 6, 12 and 24 h with free OVA-FITC, TA-Fe<sup>III</sup>-OVA-FITC and Fe<sup>III</sup>-TA-OVA-FITC. Scale bar: 10 µm. (b) Flow cytometry assay results of the intracellular MFI of B16-OVA cells after incubate with free OVA, TA-Fe<sup>III</sup>-OVA and Fe<sup>III</sup>-TA-OVA at incubation time (12 and 24 h). All data are presented as mean ± SD (n = 3). \*\*\*p < 0.001; \*\*p < 0.01; \*p < 0.05.

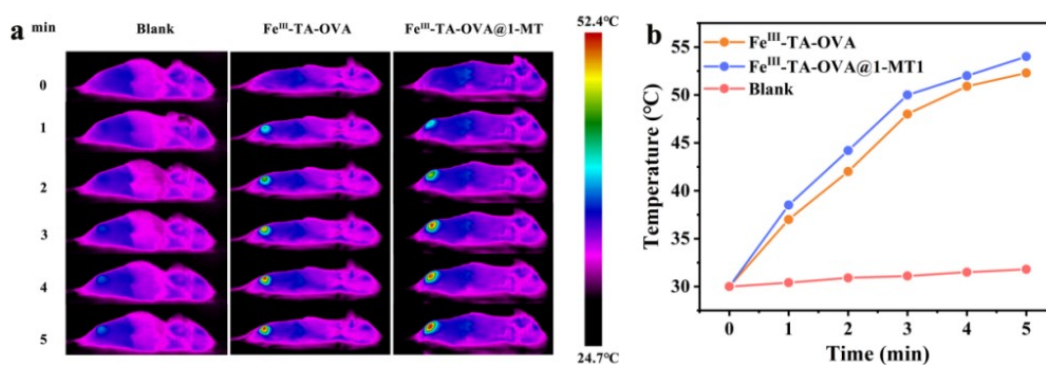

**Fig. S17.** (a) IR thermal images. (b) Corresponding tumor temperature change curves of B16-OVA tumor mice.

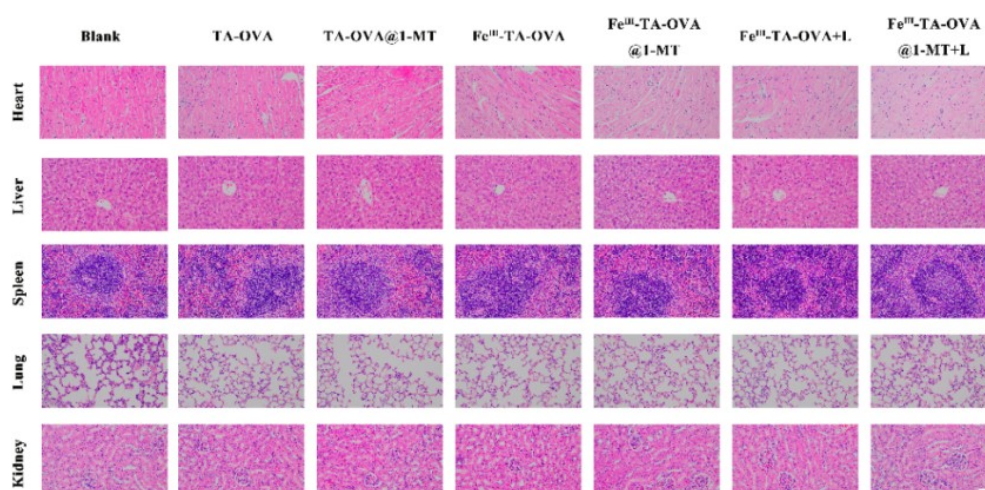

**Fig. S18.** The main organs of each group were stained by H&E staining. Scale bar: 50 μm.

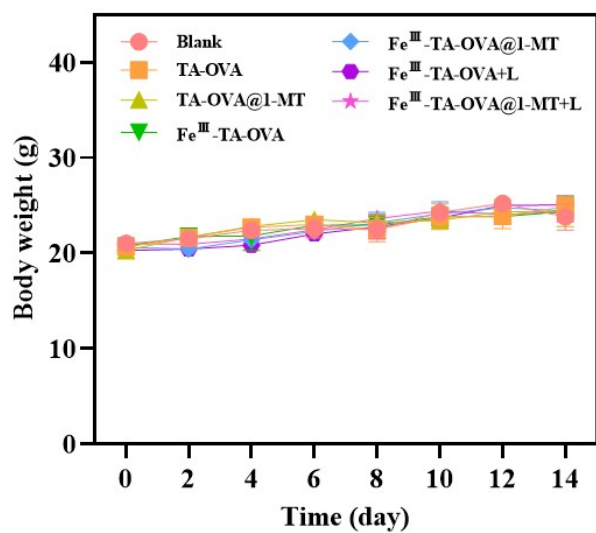

Fig. S19. Body weight curves of the mice during various treatments.

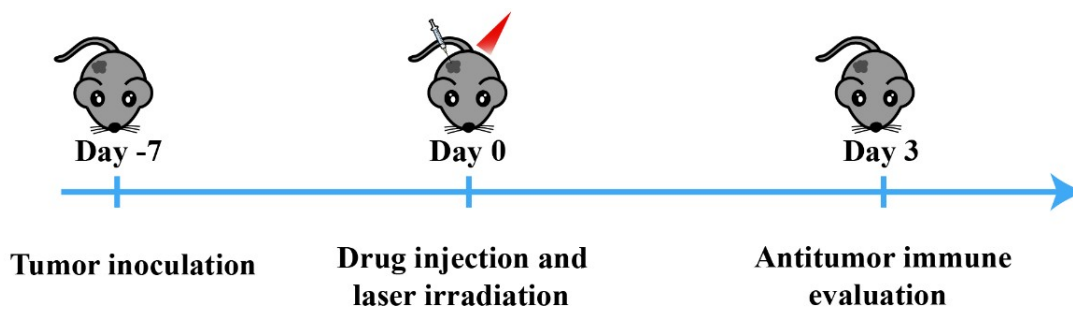

Fig. S20. Schematic illustration of immune effect test *in vitro*.
